# Supplementary material for: Phylogenetic taxonomy of the Zambian Anopheles coustani group using a mitogenomics approach
Source: Research Square preprint supplement (doi:10.21203/rs.3.rs-5976492/v1), 2025-04-07
Supplement: Supplementary file 1 [file b6c2bf90bb0efeb0ce8046c9.docx]

Supplementary information for

Phylogenetic taxonomy of the Zambian *Anopheles coustani* group using a mitogenomics approach

Soha Usmani1,2, Mary E. Gebhardt1,2, Limonty Simubali3, Kochelani Saili3, Westone Hamwata4, Hunter Chilusu4, Mbanga Muleba4, Conor J. McMeniman1,2, Anne C. Martin2,5, William J. Moss2,5, Douglas E. Norris*1,2 and Reneé L.M.N. Ali*1,2

1The W. Harry Feinstone Department of Molecular Microbiology and Immunology, Johns Hopkins Bloomberg School of Public Health, Baltimore, MD, USA.

2The Johns Hopkins Malaria Research Institute, Johns Hopkins Bloomberg School of Public Health, Baltimore, MD, USA.

3Macha Research Trust, Choma, Zambia.

4Tropical Diseases Research Centre, Ndola, Zambia.

5Department of Epidemiology, Johns Hopkins Bloomberg School of Public Health, Baltimore, MD, USA.

*equally contributing authors

Corresponding author: [rali23@jh.edu](mailto:rali23@jh.edu)

Table S1. Mitochondrial genome characteristics for *An. coustani* group members from this

study

| **GenBank Accession #** | **Morph ID** | **Contig size** | **GC%** | **AT%** | **Geographic location collected** |
| --- | --- | --- | --- | --- | --- |
| PP385940 | *An. tenebrosus* | 15399 | 21.8 | 78.2 | Choma |
| PP392958 | *An. coustani sensu lato* | 15174 | 22.1 | 77.9 | Nchelenge |
| PP385941 | *An.coustani* | 15349 | 21.7 | 78.3 | Choma |
| PP385943 | *An. ziemanni* | 15407 | 21.6 | 78.4 | Nchelenge |
| PP392959 | *An. coustani sensu lato* | 15413 | 21.8 | 78.2 | Nchelenge |
| PP385945 | *An. ziemanni* | 15409 | 21.6 | 78.4 | Nchelenge |
| PP385492 | *An.coustani* | 15408 | 21.7 | 78.3 | Nchelenge |
| PP413756 | *An. coustani sensu lato* | 15796 | 21.4 | 78.6 | Choma |
| PP385944 | *An. coustani sensu lato* | 15407 | 21.6 | 78.4 | Choma |
| PP375116 | *An. paludis* | 15425 | 21.9 | 78.1 | Nchelenge |
| PQ585798 | *An. tenebrosus* | 15404 | 21.8 | 78.2 | Nchelenge |
| PQ587038 | *An. coustani sensu lato* | 15408 | 21.8 | 78.2 | Nchelenge |
| PQ587036 | *An. coustani sensu lato* | 15408 | 21.8 | 78.2 | Nchelenge |
| PQ587037 | *An. coustani sensu lato* | 15636 | 21.8 | 78.2 | Nchelenge |
| PQ587039 | *An.coustani* | 15406 | 21.7 | 78.3 | Mbala |
| PQ587041 | *An. ziemanni* | 15408 | 21.7 | 78.3 | Chilubi |
| PQ587040 | *An. ziemanni* | 15409 | 21.7 | 78.3 | Chilubi |

Table S2. Pairwise genetic distances between representative species from each clade of the *An. coustani* group from phylogenetic tree generated from BEAST v 2.7.6 ( Figure 2).
